# Supplementary material for: Association Analysis for Some Biochemical Traits in Wild Relatives of Wheat under Drought Stress Conditions
Source: MDPI journal article supplement (doi:10.3390/genes13081491), 2022-08-21
Supplement: s1 [file s1]

**Supplementary Table S1.** Passport of the genetic materials used in this study.

| No. | Species | Code        | No. | Species | Code          | No. | Species | Code          | No. | Species | Code        |
|-----|---------|-------------|-----|---------|---------------|-----|---------|---------------|-----|---------|-------------|
| 1   | TA      | *7499-2     | 48  | AT      | NPGBI-01-0836 | 95  | AT      | NPGBI-01-1559 | 142 | AC      | IUGB-003885 |
| 2   | TA      | IUGB-00133  | 49  | AT      | IUGB-00020    | 96  | AC      | IUGB-00373    | 143 | ACR     | NPGBI-976   |
| 3   | TA      | IUGB-00134  | 50  | AT      | IUGB-00107    | 97  | AC      | IUGB-00189    | 144 | ACR     | NPGBI-365   |
| 4   | TA      | IUGB-00264  | 51  | AT      | IUGB-00164    | 98  | AC      | IUGB-00236    | 145 | ACR     | NPGBI-310   |
| 5   | TA      | IUGB-00447  | 52  | AT      | IUGB-00193    | 99  | AC      | IUGB-00267    | 146 | ACR     | NPGBI-300   |
| 6   | TA      | IUGB-00453  | 53  | AT      | IUGB-00196    | 100 | AC      | IUGB-00188    | 147 | ACR     | NPGBI-309   |
| 7   | TA      | IUGB-00460  | 54  | AT      | IUGB-00198    | 101 | AC      | IUGB-00359    | 148 | ACR     | NPGBI-2066  |
| 8   | TA      | IUGB-00480  | 55  | AT      | IUGB-00039    | 102 | AC      | IUGB-00403    | 149 | ACR     | NPGBI-1589  |
| 9   | TA      | IUGB-00482  | 56  | AT      | IUGB-00223    | 103 | AC      | IUGB-00210    | 150 | ACR     | NPGBI-792   |
| 10  | TA      | IUGB-00485  | 57  | AT      | IUGB-00224    | 104 | AC      | IUGB-00185    | 151 | ACR     | NPGBI-947   |
| 11  | TA      | IUGB-00516  | 58  | AT      | IUGB-00245    | 105 | AC      | IUGB-00156    | 152 | ACR     | NPGBI-1485  |
| 12  | TA      | IUGB-00911  | 59  | AT      | IUGB-00247    | 106 | AC      | IUGB-01746    | 153 | ACR     | NPGBI-1508  |
| 13  | TA      | IUGB-01569  | 60  | AT      | IUGB-00260    | 107 | AC      | IUGB-00221    | 154 | ACR     | NPGBI-384   |
| 14  | TA      | IUGB-01635  | 61  | AT      | IUGB-00261    | 108 | AC      | IUGB-00200    | 155 | ACR     | NPGBI-2112  |
| 15  | TA      | IUGB-01671  | 62  | AT      | IUGB-00143    | 109 | AC      | IUGB-00150    | 156 | ACR     | NPGBI-1384  |
| 16  | TA      | IUGB-01695  | 63  | AT      | IUGB-00325    | 110 | AC      | IUGB-00168    | 157 | ACR     | NPGBI-720   |
| 17  | TA      | IUGB-01696  | 64  | AT      | IUGB-00365    | 111 | AC      | IUGB-00034    | 158 | ACR     | NPGBI-2063  |
| 18  | TA      | IUGB-00615  | 65  | AT      | IUGB-00366    | 112 | AC      | IUGB-00078    | 159 | ACR     | NPGBI-911   |
| 19  | TA      | IUGB-00597  | 66  | AT      | IUGB-00369    | 113 | AC      | IUGB-00090    | 160 | ACR     | NPGBI-1699  |
| 20  | TA      | IUGB-00604  | 67  | AT      | IUGB-00402    | 114 | AC      | IUGB-00406    | 161 | ACR     | NPGBI-587   |
| 21  | TA      | IUGB-00603  | 68  | AT      | IUGB-00151    | 115 | AC      | IUGB-00258    | 162 | ACR     | NPGBI-794   |
| 22  | TA      | IUGB-00576  | 69  | AT      | IUGB-00291    | 116 | AC      | IUGB-00248    | 163 | ACR     | NPGBI-944   |
| 23  | TA      | IUGB-00618  | 70  | AT      | IUGB-00382    | 117 | AC      | IUGB-00388    | 164 | ACR     | NPGBI-2117  |
| 24  | TA      | IUGB-01845  | 71  | AT      | IUGB-00238    | 118 | AC      | IUGB-01592    | 165 | ACR     | NPGBI-1742  |
| 25  | TA      | IUGB-00518  | 72  | AT      | IUGB-00249    | 119 | AC      | IUGB-00271    | 166 | ACR     | NPGBI-598   |
| 26  | TA      | IUGB-00593  | 73  | AT      | IUGB-00367    | 120 | AC      | IUGB-00202    | 167 | ACR     | NPGBI-1638  |
| 27  | TA      | IUGB-00570  | 74  | AT      | IUGB-00273    | 121 | AC      | IUGB-00201    | 168 | ACR     | NPGBI-744   |
| 28  | TA      | IUGB-00575  | 75  | AT      | IUGB-00274    | 122 | AC      | IUGB-00406    | 169 | ACR     | NPGBI-1473  |
| 29  | TA      | IUGB-01846  | 76  | AT      | IUGB-00276    | 123 | AC      | IUGB-00229    | 170 | ACR     | NPGBI-1522  |
| 30  | TA      | IUGBI-00577 | 77  | AT      | IUGB-00279    | 124 | AC      | IUGB-00090    | 171 | ACR     | NPGBI-675   |
| 31  | TA      | IUGBI-00589 | 78  | AT      | IUGB-00289    | 125 | AC      | IUGB-00270    | 172 | ACR     | NPGBI-730   |
| 32  | TA      | IUGB-00573  | 79  | AT      | IUGB-00374    | 126 | AC      | IUGB-00059    | 173 | ACR     | NPGBI-689   |
| 33  | TA      | IUGB-00600  | 80  | AT      | IUGB-00383    | 127 | AC      | IUGB-00132    | 174 | ACR     | NPGBI-50067 |
| 34  | TA      | IUGB-00578  | 81  | AT      | IUGB-00386    | 128 | AC      | IUGB-00095    | 175 | ACR     | NPGBI-50119 |
| 35  | TA      | IUGB-00602  | 82  | AT      | IUGB-00396    | 129 | AC      | IUGB-00062    | 176 | ACR     | NPGBI-50174 |
| 36  | TA      | IUGB-00586  | 83  | AT      | IUGB-00400    | 130 | AC      | IUGB-01359    | 177 | ACR     | NPGBI-50040 |
| 37  | TA      | IUGB-00598  | 84  | AT      | IUGB-00401    | 131 | AC      | IUGB-01238    | 178 | ACR     | IUGB-00379  |
| 38  | TA      | IUGB-00515  | 85  | AT      | IUGB-00404    | 132 | AC      | IUGB-00239    | 179 | ACR     | IUGB-01564  |
| 39  | TA      | IUGB-01847  | 86  | AT      | IUGB-00405    | 133 | AC      | IUGB-00078    | 180 | ACR     | IUGB-00881  |
| 40  | TA      | IUGB-00534  | 87  | AT      | NPGBI-01-1970 | 134 | AC      | IUGB-00065    | 181 | ACR     | IUGB-00817  |
| 41  | TA      | IUGB-00613  | 88  | AT      | NPGBI-01-2120 | 135 | AC      | IUGB-00391    | 182 | ACR     | IUGB-00170  |
| 42  | TA      | IUGB-00590  | 89  | AT      | IUGB-00297    | 136 | AC      | IUGB-00241    | 183 | ACR     | IUGB-00408  |
| 43  | TA      | IUGB-00606  | 90  | AT      | IUGB-01746    | 137 | AC      | IUGB-00153    | 184 | ACR     | IUGB-00319  |
| 44  | TA      | IUGB-00599  | 91  | AT      | NPGBI-50006   | 138 | AC      | IUGB-00390    | 185 | ACR     | IUGB-00280  |
| 45  | TA      | IUGB-01840  | 92  | AT      | NPGBI-50084   | 139 | AC      | IUGB-00399    | 186 | ACR     | IUGB-00284  |
| 46  | TA      | IUGB-00532  | 93  | AT      | NPGBI-01-0312 | 140 | AC      | IUGB-00201S   |     |         |             |
| 47  | TA      | IUGB-00580  | 94  | AT      | NPGBI-01-0804 | 141 | AC      | IUGB-01592    |     |         |             |

TA, AT, AC and ACR indicate *T. aestivum*, *Ae. tauschii*, *Ae. cylindrica* and *Ae. crassa* species respectively.

IUGB: Ilam University Genebank

NPGBI: The National Plant Gene Bank of Iran

\*Tehran University Genebank
